# Supplementary material for: Taming polysulfides in sulfur-based batteries via electrolyte-soluble thiomolybdate additives
Source: Royal Society of Chemistry journal article supplement (doi:10.1039/d2ta03893e), 2022-01-01
Supplement: d2ta03893e1.pdf [file d2ta03893e1.pdf]

## Supporting Information

### **Taming Polysulfides in Sulfur-based Batteries via Electrolyte-soluble Thiomolybdate Additives**

Hooman Yaghoobnejad Asl<sup>1</sup>, Amruth Bhargav<sup>1</sup>, Arumugam Manthiram<sup>1,\*</sup>

<sup>1</sup> Materials Science and Engineering Program and Texas Materials Institute, University of Texas at Austin, Austin, TX 78712, USA.

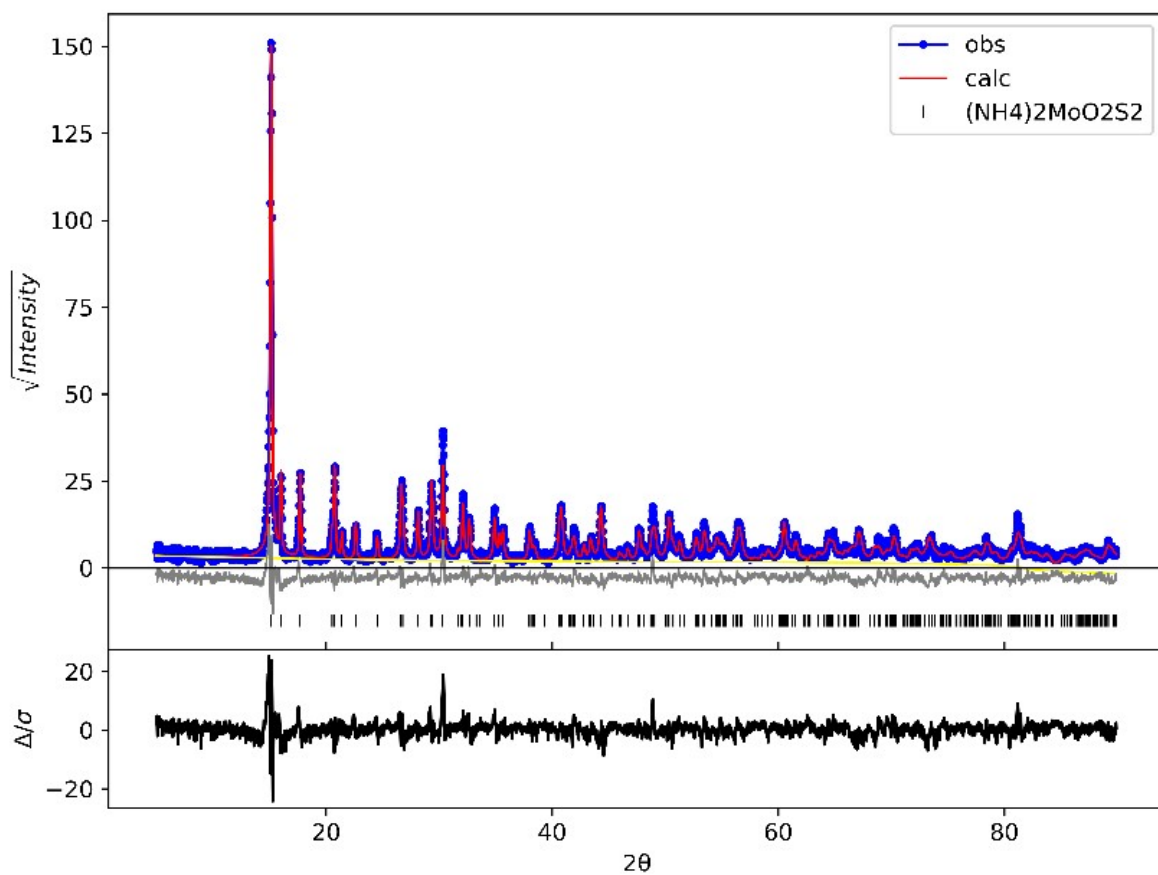

Figure S1. Pawley refinement on the powder XRD pattern of the crystalline  $(\text{NH}_4)_2\text{MoO}_2\text{S}_2$ , indicating the phase purity of the product.

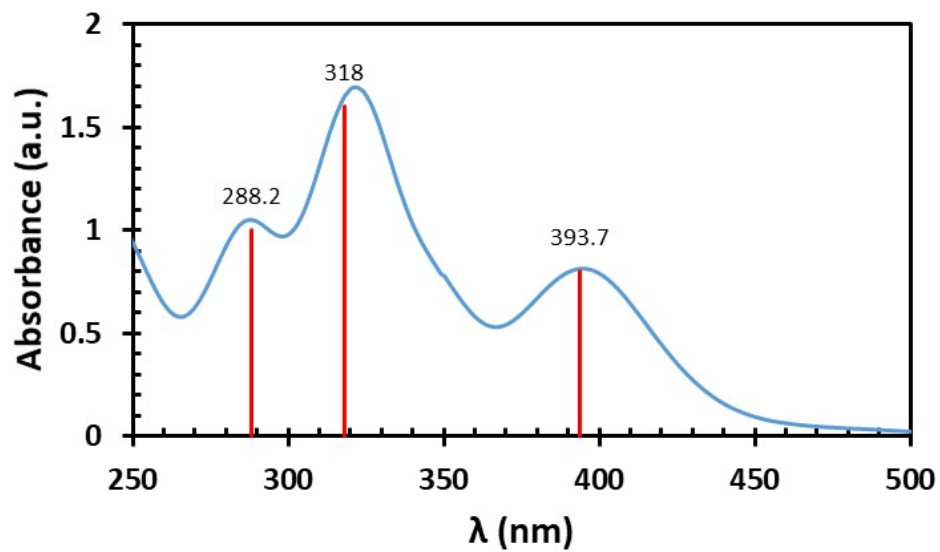

Figure S2. Optical absorption spectrum of an aqueous solution of  $(\text{NH}_4)_2\text{MoO}_2\text{S}_2$  obtained through equation 1. The bars and numbers indicate previously reported absorption maxima for the pure  $\text{Mo}_2\text{O}_2\text{S}_2$  dianion.

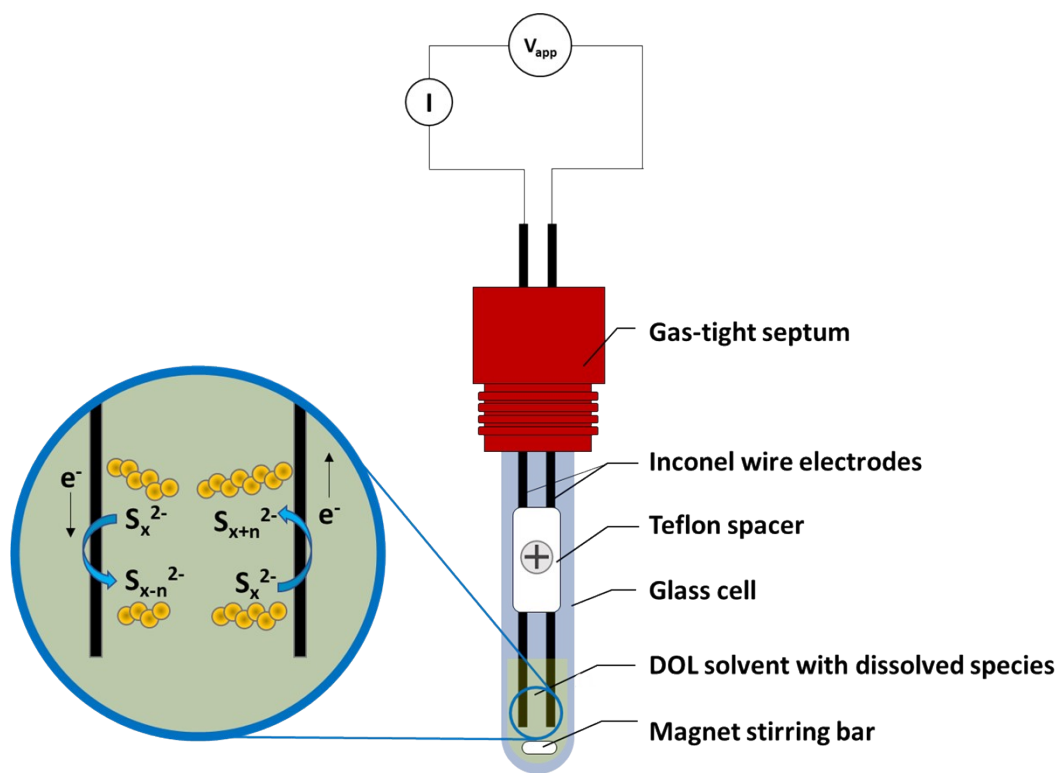

Figure S3. Schematic representation of the cell used for *in-situ* chronoamperometric analyses.

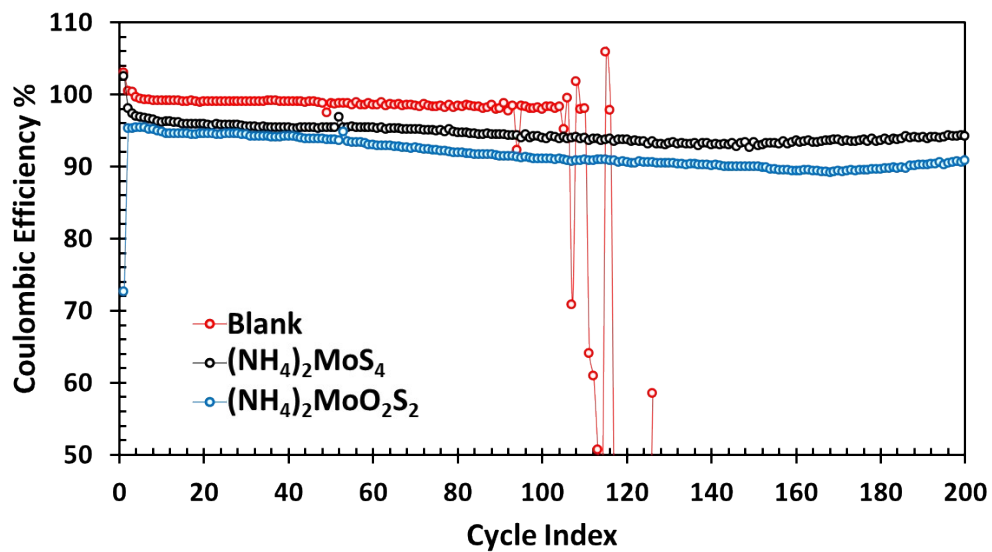

Figure S4. The effect of the thiomolybdate additives on the evolution of the coulombic efficiency in Li-S cells.

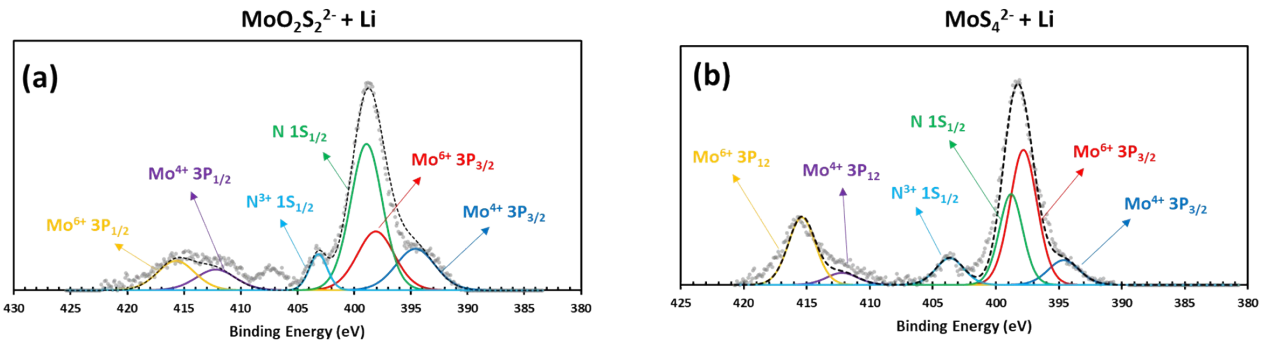

Figure S5. XPS data of Li anode exposed to  $\text{MoO}_2\text{S}_2^{2-}$  (a) and  $\text{MoS}_4^{2-}$  (b) after 1,000 s of Ar-ion sputtering.

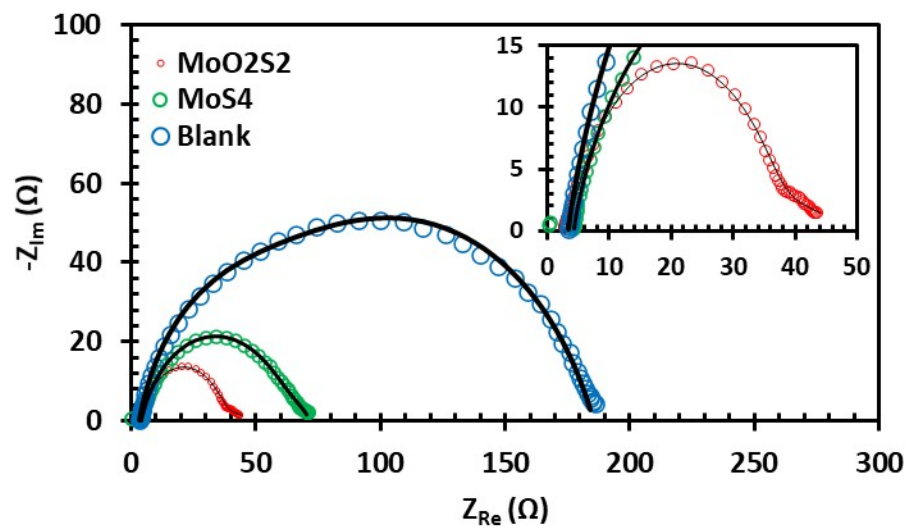

**Figure S6.** Electrochemical impedance spectra of pristine Li-S cells with various MoX<sub>2</sub>S<sub>2</sub><sup>2-</sup> additives and that of the blank cell.

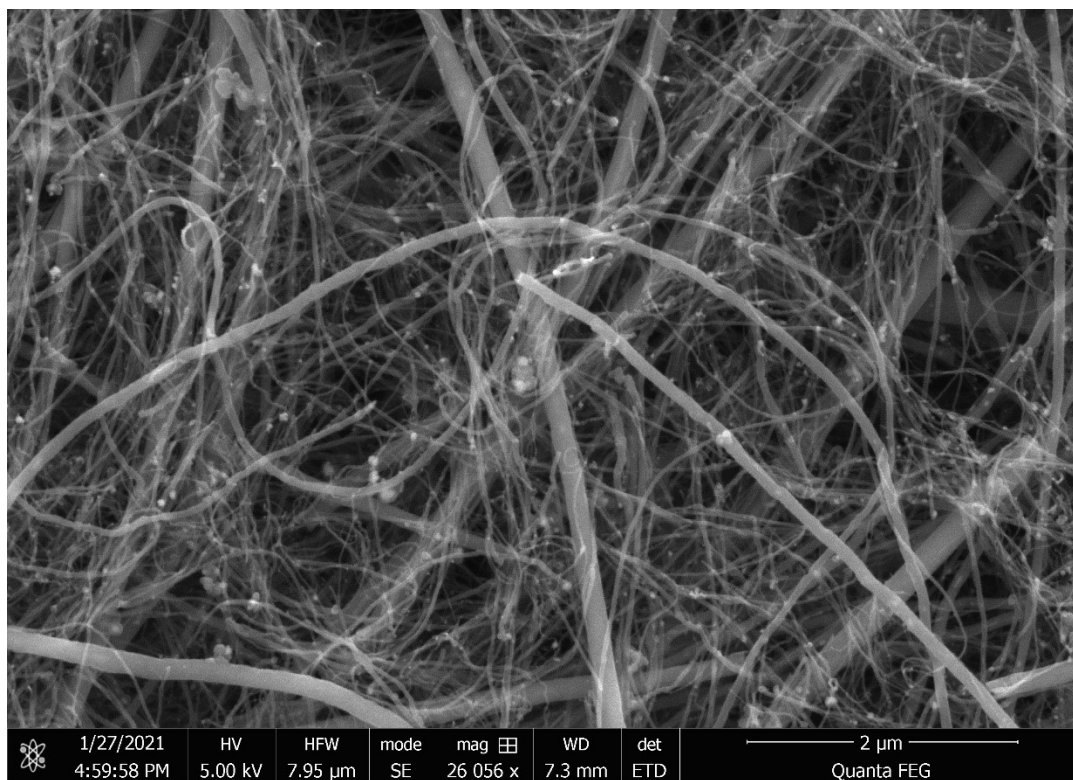

**Figure S7.** SEM image of the bucky paper carbon host used in this work for S cathode storage.



**Table S1.** Crystal data and structure refinement for compound A.

|                                             |                                                                                              |
|---------------------------------------------|----------------------------------------------------------------------------------------------|
| Empirical formula                           | C <sub>10</sub> H <sub>27</sub> Mo <sub>2</sub> N <sub>3</sub> O <sub>2</sub> S <sub>8</sub> |
| Formula weight                              | 669.70                                                                                       |
| Temperature/K                               | 100.02(11)                                                                                   |
| Crystal system                              | monoclinic                                                                                   |
| Space group                                 | P2 <sub>1</sub> /c                                                                           |
| a/Å                                         | 20.6130(14)                                                                                  |
| b/Å                                         | 9.7726(4)                                                                                    |
| c/Å                                         | 12.3444(5)                                                                                   |
| α/°                                         | 90                                                                                           |
| β/°                                         | 92.710(5)                                                                                    |
| γ/°                                         | 90                                                                                           |
| Volume/Å <sup>3</sup>                       | 2483.9(2)                                                                                    |
| Z                                           | 4                                                                                            |
| ρ <sub>calc</sub> /g/cm <sup>3</sup>        | 1.791                                                                                        |
| μ/mm <sup>-1</sup>                          | 1.693                                                                                        |
| F(000)                                      | 1344.0                                                                                       |
| Crystal size/mm <sup>3</sup>                | 0.406 × 0.241 × 0.042                                                                        |
| Radiation                                   | Mo Kα (λ = 0.71073)                                                                          |
| 2θ range for data collection/°              | 5.318 to 59.942                                                                              |
| Index ranges                                | -28 ≤ h ≤ 19, -13 ≤ k ≤ 13, -16 ≤ l ≤ 17                                                     |
| Reflections collected                       | 18094                                                                                        |
| Independent reflections                     | 6193 [R <sub>int</sub> = 0.0329, R <sub>sigma</sub> = 0.0465]                                |
| Data/restraints/parameters                  | 6193/0/235                                                                                   |
| Goodness-of-fit on F <sup>2</sup>           | 1.088                                                                                        |
| Final R indexes [I ≥ 2σ (I)]                | R <sub>1</sub> = 0.0422, wR <sub>2</sub> = 0.0728                                            |
| Final R indexes [all data]                  | R <sub>1</sub> = 0.0561, wR <sub>2</sub> = 0.0781                                            |
| Largest diff. peak/hole / e Å <sup>-3</sup> | 1.33/-1.17                                                                                   |

**Table S2.** Fractional Atomic Coordinates ( $\times 10^4$ ) and Equivalent Isotropic Displacement Parameters ( $\text{\AA}^2 \times 10^3$ ) for compound A.  $U_{\text{eq}}$  is defined as 1/3 of the trace of the orthogonalized  $U_{ij}$  tensor.

| Atom | x          | y          | z         | $U_{\text{eq}}$ |
|------|------------|------------|-----------|-----------------|
| Mo1  | 7515.9(2)  | 5144.5(3)  | 4711.2(3) | 12.29(8)        |
| Mo2  | 8667.4(2)  | 6583.7(3)  | 4300.5(2) | 10.98(8)        |
| O1   | 7765.7(13) | 3491(3)    | 4708(2)   | 19.2(6)         |
| O2   | 9221.5(13) | 5328(3)    | 4195(2)   | 16.7(6)         |
| S1   | 6520.2(5)  | 5394.9(12) | 3640.0(8) | 23.2(2)         |
| S2   | 5708.1(5)  | 5343.5(12) | 4597.3(9) | 24.9(2)         |
| S3   | 6050.2(5)  | 4198.8(11) | 5879.1(9) | 25.0(2)         |
| S4   | 6881.2(5)  | 5294.8(11) | 6321.2(8) | 20.2(2)         |
| S5   | 8176.5(5)  | 6426.3(10) | 5933.0(7) | 15.84(19)       |
| S6   | 9253.8(5)  | 8576.7(10) | 4938.5(8) | 19.5(2)         |
| S7   | 8966.6(5)  | 8548.2(10) | 3297.7(8) | 18.2(2)         |
| S8   | 7821.5(5)  | 6152.5(10) | 3062.8(7) | 15.86(19)       |
| C1   | 6372(2)    | 1005(5)    | 4159(3)   | 26.1(10)        |
| C2   | 7448(2)    | -35(4)     | 4477(4)   | 26.2(10)        |
| C3   | 6885(2)    | 979(4)     | 5978(3)   | 22.9(9)         |
| C4   | 6488(2)    | 1148(4)    | 5167(5)   | 37.2(12)        |
| C5   | 9116(2)    | 1184(4)    | 6687(3)   | 21.2(9)         |
| C6   | 9312.5(19) | 3592(4)    | 6326(3)   | 17.3(8)         |
| C7   | 9525(2)    | 2689(4)    | 8155(3)   | 23.3(9)         |
| C8   | 8405(2)    | 2921(4)    | 7422(3)   | 21.8(9)         |
| C9   | 4982(2)    | 1518(4)    | 7008(4)   | 27.3(10)        |
| C10  | 4731(2)    | 2358(5)    | 7868(4)   | 33.1(11)        |
| N1   | 6800.3(16) | 201(3)     | 4941(3)   | 17.8(7)         |
| N2   | 9086.1(15) | 2596(3)    | 7151(2)   | 13.8(6)         |
| N3   | 5177(2)    | 853(4)     | 6341(4)   | 39.7(10)        |

**Table S3.** Anisotropic Displacement Parameters ( $\text{\AA}^2 \times 10^3$ ) for compound A. The Anisotropic displacement factor exponent takes the form:  $-2\pi^2[h^2a^*2U_{11}+2hka^*b^*U_{12}+\dots]$

| Atom | $U_{11}$  | $U_{22}$ | $U_{33}$  | $U_{23}$ | $U_{13}$ | $U_{12}$ |
|------|-----------|----------|-----------|----------|----------|----------|
| Mo1  | 16.65(16) | 8.92(14) | 11.61(15) | 0.11(12) | 4.05(12) | 1.07(12) |
| Mo2  | 15.45(16) | 7.26(14) | 10.19(15) | 0.92(12) | 0.38(12) | 0.98(12) |
| O1   | 22.6(15)  | 12.2(13) | 23.6(15)  | -0.5(11) | 10.0(12) | 0.8(11)  |
| O2   | 19.6(14)  | 12.1(13) | 18.7(14)  | -1.2(11) | 4.9(11)  | 0.8(11)  |
| S1   | 17.7(5)   | 35.1(6)  | 16.8(5)   | -2.2(4)  | 1.0(4)   | -1.6(4)  |
| S2   | 17.4(5)   | 33.3(6)  | 24.2(5)   | -0.1(5)  | 3.8(4)   | -2.1(4)  |
| S3   | 25.2(6)   | 19.9(5)  | 30.7(6)   | 2.3(5)   | 10.5(5)  | -1.5(4)  |
| S4   | 21.4(5)   | 23.7(5)  | 15.9(5)   | 2.6(4)   | 6.0(4)   | 2.1(4)   |
| S5   | 20.1(5)   | 17.7(5)  | 9.7(4)    | -2.0(4)  | 0.4(4)   | 3.2(4)   |
| S6   | 23.7(5)   | 14.3(5)  | 20.1(5)   | -4.3(4)  | -5.0(4)  | -0.9(4)  |
| S7   | 22.9(5)   | 12.9(4)  | 18.4(5)   | 2.9(4)   | -3.0(4)  | -3.7(4)  |
| S8   | 19.5(5)   | 17.4(5)  | 10.7(4)   | 0.6(4)   | 0.3(4)   | -5.2(4)  |
| C1   | 27(2)     | 31(2)    | 20(2)     | -0.3(19) | -4.1(18) | 5.8(19)  |
| C2   | 19(2)     | 25(2)    | 36(3)     | -0.3(19) | 11.0(19) | 4.1(18)  |
| C3   | 27(2)     | 22(2)    | 20(2)     | 5.2(18)  | 1.2(17)  | 2.6(18)  |
| C4   | 31(3)     | 15(2)    | 67(4)     | 2(2)     | 12(2)    | -4.4(19) |
| C5   | 34(2)     | 10.5(18) | 20(2)     | -3.3(16) | 4.0(17)  | -3.4(17) |
| C6   | 22(2)     | 14.2(18) | 16.4(19)  | 5.4(15)  | 5.2(16)  | 0.1(15)  |
| C7   | 36(3)     | 16.0(19) | 17(2)     | -0.4(17) | -6.7(18) | 0.4(18)  |
| C8   | 22(2)     | 22(2)    | 22(2)     | -3.3(17) | 8.2(17)  | -3.8(17) |
| C9   | 22(2)     | 21(2)    | 38(3)     | 7(2)     | -1(2)    | -4.3(18) |
| C10  | 40(3)     | 24(2)    | 35(3)     | 0(2)     | 4(2)     | 4(2)     |
| N1   | 17.0(17)  | 10.4(15) | 26.4(18)  | 0.9(14)  | 5.2(14)  | -0.4(13) |
| N2   | 17.9(17)  | 10.9(15) | 12.8(15)  | 0.9(12)  | 3.8(12)  | -0.4(12) |
| N3   | 31(2)     | 39(2)    | 49(3)     | -6(2)    | 11(2)    | 0.4(19)  |

**Table S4.** Bond Lengths for compound A

| <b>Atom Atom</b> | <b>Length/Å</b> | <b>Atom Atom</b> | <b>Length/Å</b> |
|------------------|-----------------|------------------|-----------------|
| Mo1 Mo2          | 2.8253(5)       | S3 S4            | 2.0714(15)      |
| Mo1 O1           | 1.696(3)        | S6 S7            | 2.0834(14)      |
| Mo1 S1           | 2.4009(11)      | C5 N2            | 1.496(5)        |
| Mo1 S4           | 2.4351(10)      | C6 N2            | 1.500(4)        |
| Mo1 S5           | 2.3461(10)      | C7 N2            | 1.502(5)        |
| Mo1 S8           | 2.3726(10)      | C8 N2            | 1.493(5)        |
| Mo2 O2           | 1.685(3)        | C1 N1            | 1.500(5)        |
| Mo2 S5           | 2.3026(10)      | C2 N1            | 1.496(5)        |
| Mo2 S6           | 2.4052(10)      | C3 N1            | 1.492(5)        |
| Mo2 S7           | 2.3813(10)      | C4 N1            | 1.499(5)        |
| Mo2 S8           | 2.3022(10)      | C9 C10           | 1.456(6)        |
| S1 S2            | 2.0950(15)      | C9 N3            | 1.138(6)        |
| S2 S3            | 2.0364(16)      |                  |                 |

**Table S5.** Values of various components used in the fitting of electrochemical impedance spectra of Figure 10

|                                     | Blank       |             | MoS <sub>4</sub> <sup>2-</sup> |            | MoO <sub>2</sub> S <sub>2</sub> <sup>2-</sup> |             |
|-------------------------------------|-------------|-------------|--------------------------------|------------|-----------------------------------------------|-------------|
|                                     | pristine    | cycled      | pristine                       | cycled     | pristine                                      | cycled      |
| <b>L1 (H)</b>                       | 2.94(9)E-7  | 2.48(2)E-7  | 2.81(7)E-7                     | 1.29(6)E-7 | 3.01(9)E-7                                    | 4.86(8)E-7  |
| <b>R1 (Ω)</b>                       | 3.28(1)     | 3.97(7)     | 4.10(9)                        | 6.46(4)    | 1.77(4)                                       | 1.10(8)     |
| <b>R2 (Ω)</b>                       | 1.39(7)E+2  | 42.8(1)     | 12.7(7)                        | 9.98(9)    | 17.7(2)                                       | 9.8(8)      |
| <b>R3 (Ω)</b>                       | 42.6(3)     | 36.6(3)     | 55.0(1)                        | 33.3(9)    | 28.4(1)                                       | 3.2(4)      |
| <b>CPE1-T</b>                       | 7.794(8)E-5 | 73.7(7)E-4  | 4.19(3)E-3                     | 2.44(4)E-3 | 1.26(6)E-2                                    | 1.023(8)E-3 |
| <b>CPE1-P</b>                       | 0.73(5)     | 0.55(9)     | 0.56(2)                        | 0.72(2)    | 0.28(8)                                       | 0.38(6)     |
| <b>CPE2-T</b>                       | 1.322(4)E-5 | 1.804(3)E-5 | 2.10(2)E-5                     | 3.46(6)E-5 | 1.58(7)E-5                                    | 8.718(1)E-5 |
| <b>CPE2-P</b>                       | 0.88(2)     | 0.84(1)     | 0.79(8)                        | 0.71(2)    | 0.89(1)                                       | 0.89(4)     |
| <b>Σ(R<sub>w</sub><sup>2</sup>)</b> | 0.0311(3)   | 0.0082(2)   | 0.0146(2)                      | 0.0179(4)  | 0.0177(3)                                     | 0.0112(1)   |
